# Supplementary material for: Particle size effects of PtAg nanoparticles on the catalytic electrooxidation of liquid fuels
Source: Royal Society of Chemistry journal article supplement (doi:10.1039/c8qi00032h), 2018-01-01
Supplement: c8qi00032h1.pdf [file c8qi00032h1.pdf]

## Supporting Information for

### Particle size effects in the catalytic electrooxidation of liquid fuel on PtAg nanoparticles

Pingping Song, <sup>a,†</sup> Hui Xu, <sup>a,†</sup> Bo Yan, <sup>a</sup> Jin Wang, <sup>a</sup> Fei Gao, <sup>a</sup> Yangping Zhang, <sup>a</sup>  
Yukihide Shiraishi<sup>b</sup> and Yukou Du <sup>a,b,\*</sup>

<sup>a</sup>College of Chemistry, Chemical Engineering and Materials Science, Soochow  
University,  
Suzhou 215123, PR China

<sup>b</sup>Tokyo University of Science Yamaguchi, Sanyo-Onoda-shi, Yamaguchi 756-0884,  
Japan

\* Corresponding author: Tel: 86-512-65880089, Fax: 86-512-65880089;

E-mail: duyk@suda.edu.cn (Y. Du).

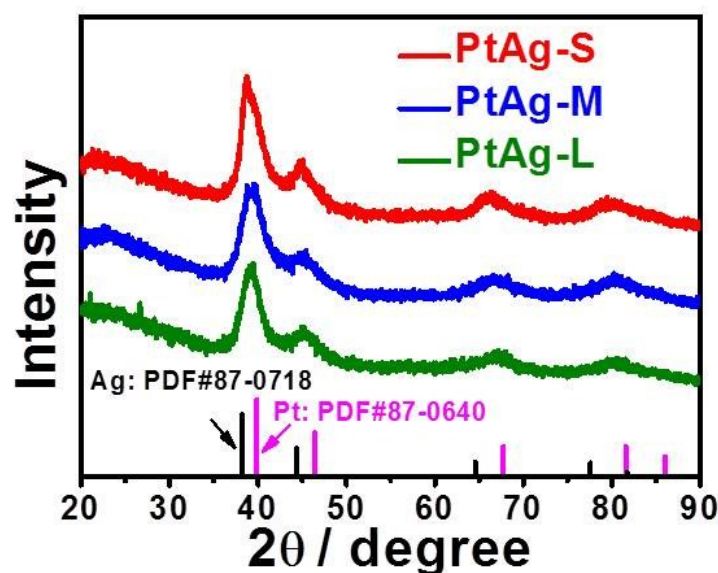

Figure S1 XRD patterns of PtAg-S, PtAg-M and PtAg-L

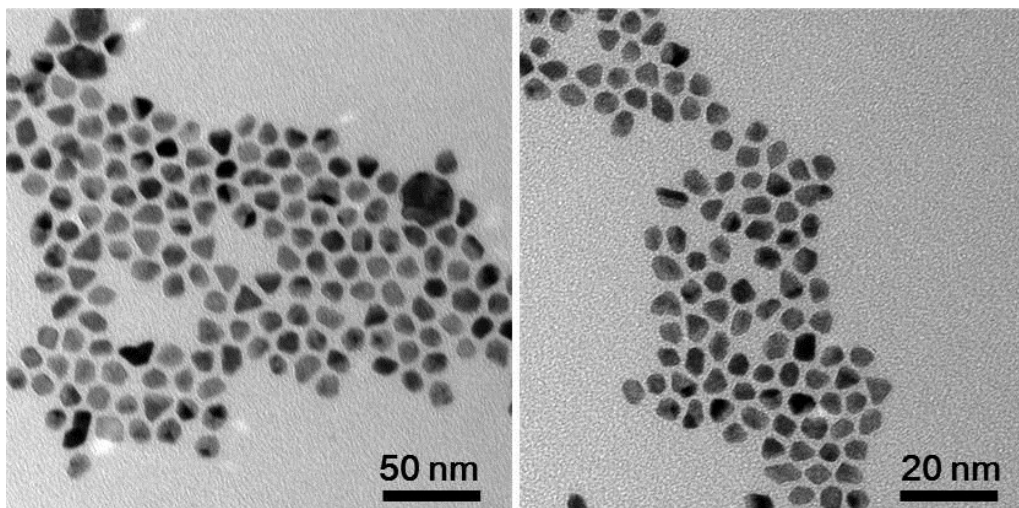

Figure S2 Representative TEM images of PtAg nanocrystals with different magnifications prepared in the absence of phloroglucinol.

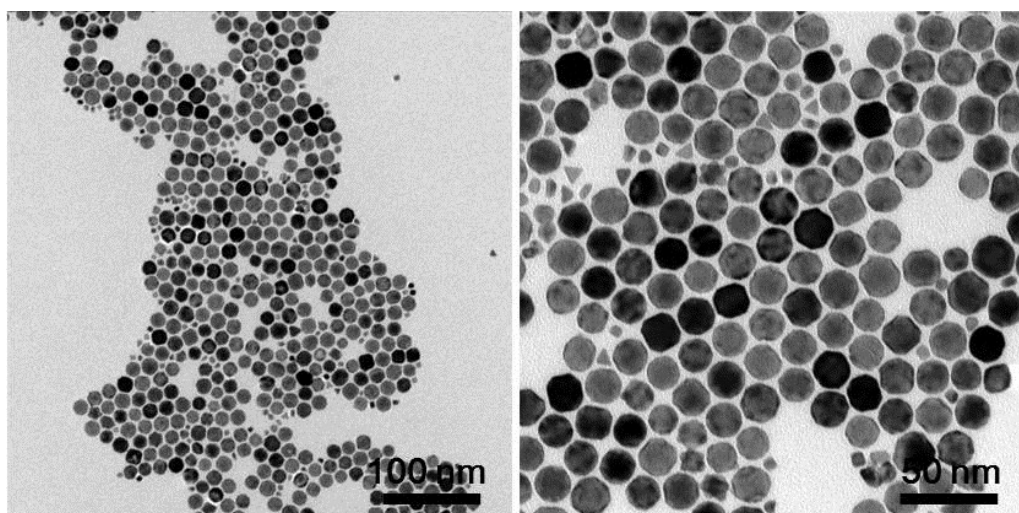

Figure S3 Representative TEM images of PtAg nanocrystals with different magnifications prepared by substituting the CTAB with CTAC.

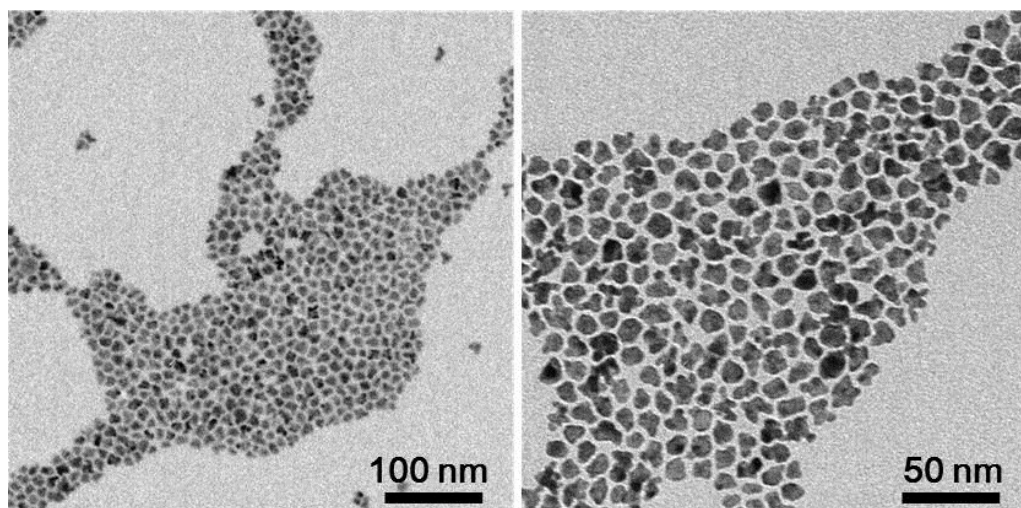

Figure S4 Representative TEM images of PtAg nanocrystals with different magnifications prepared in the absence of CTAB.

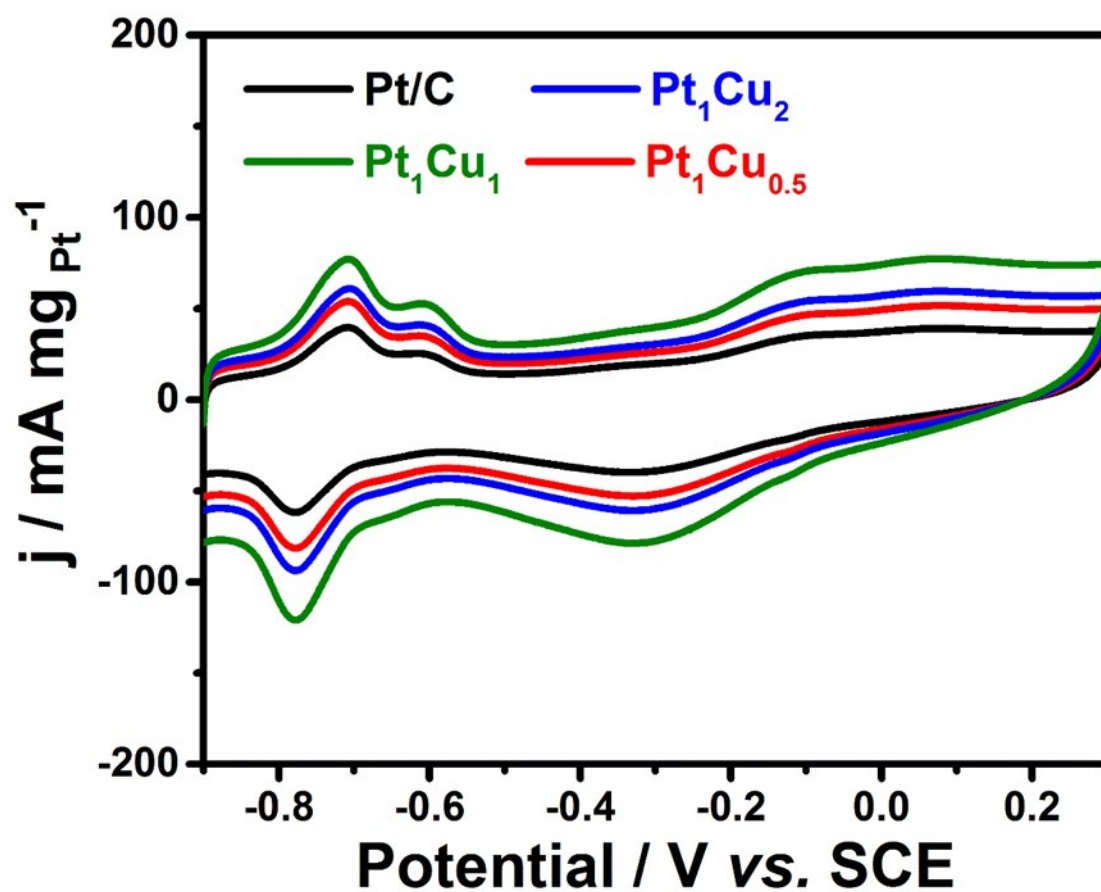

Figure S5 The CV curves of PtAg-S, PtAg-M, PtAg-L NPs and commercial Pt/C in 1 M KOH solution.

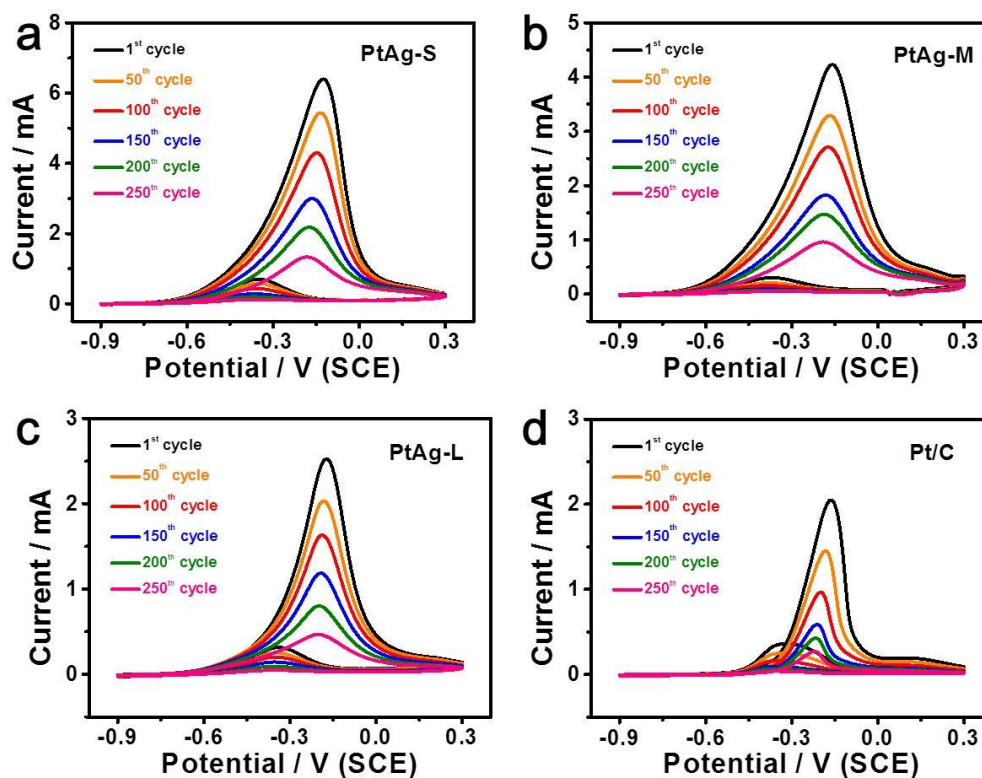

Figure S6 CVs (1<sup>st</sup>, 50<sup>th</sup>, 100<sup>th</sup>, 150<sup>th</sup>, 200<sup>th</sup>, and 250<sup>th</sup> cycle) of (a) the PtAg-S NPs, (b) PtAg-M NPs, (c) PtAg-L NPs and (d) commercial Pt/C for EGOR, respectively. The CVs were operated in the solution of 1 M KOH and 1 M EG at the scan rate of 50 mV s<sup>-1</sup>.

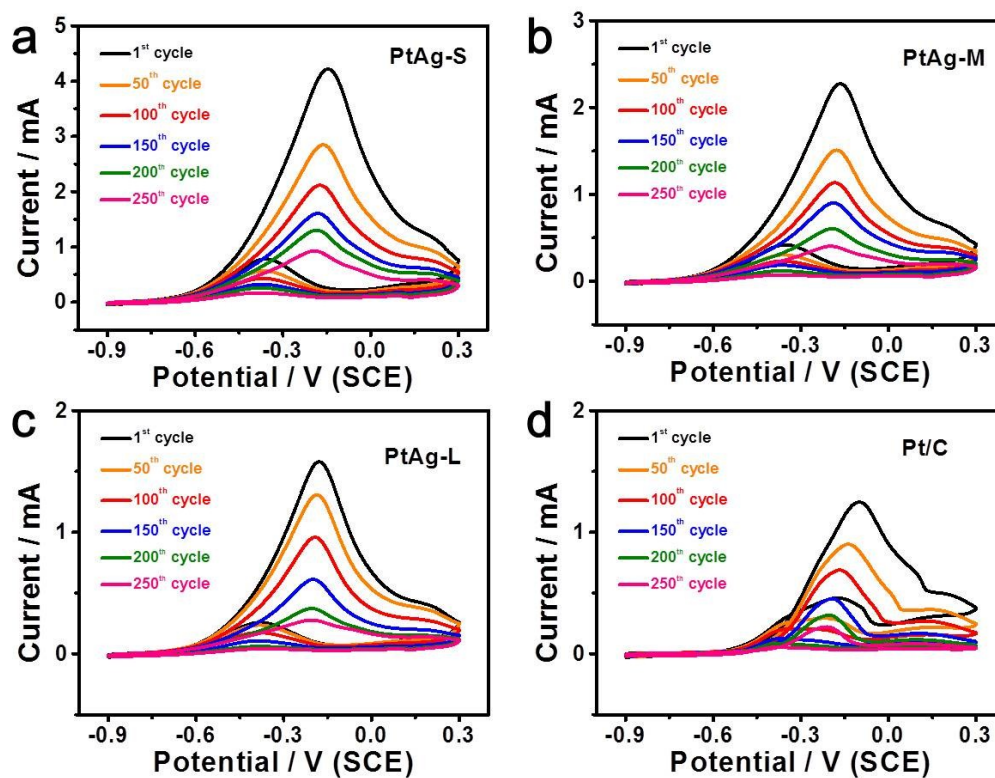

Figure S7 CVs (1<sup>st</sup>, 50<sup>th</sup>, 100<sup>th</sup>, 150<sup>th</sup>, 200<sup>th</sup>, and 250<sup>th</sup> cycle) of (a) the PtAg-S NPs, (b) PtAg-M NPs, (c) PtAg-L NPs and (d) commercial Pt/C for GOR, respectively. The CVs were operated in the solution of 1 M KOH and 1 M glycerol at the scan rate of 50 mV s<sup>-1</sup>.

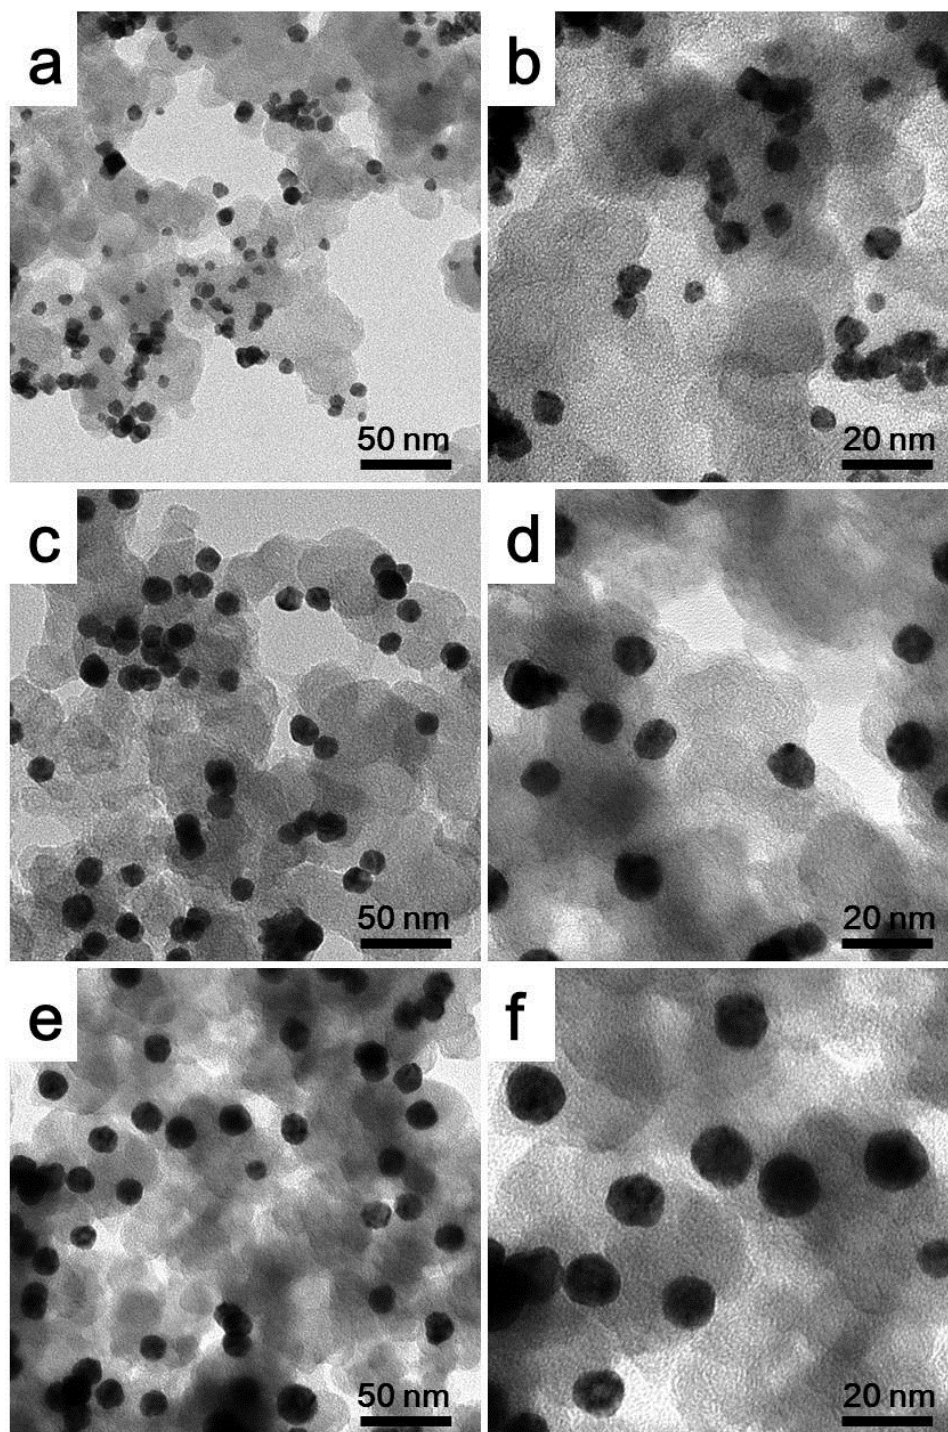

Figure S8 Additional TEM images of the PtAg-S/C NPs, PtAg-M/C NPs and PtAg-L/C NPs.

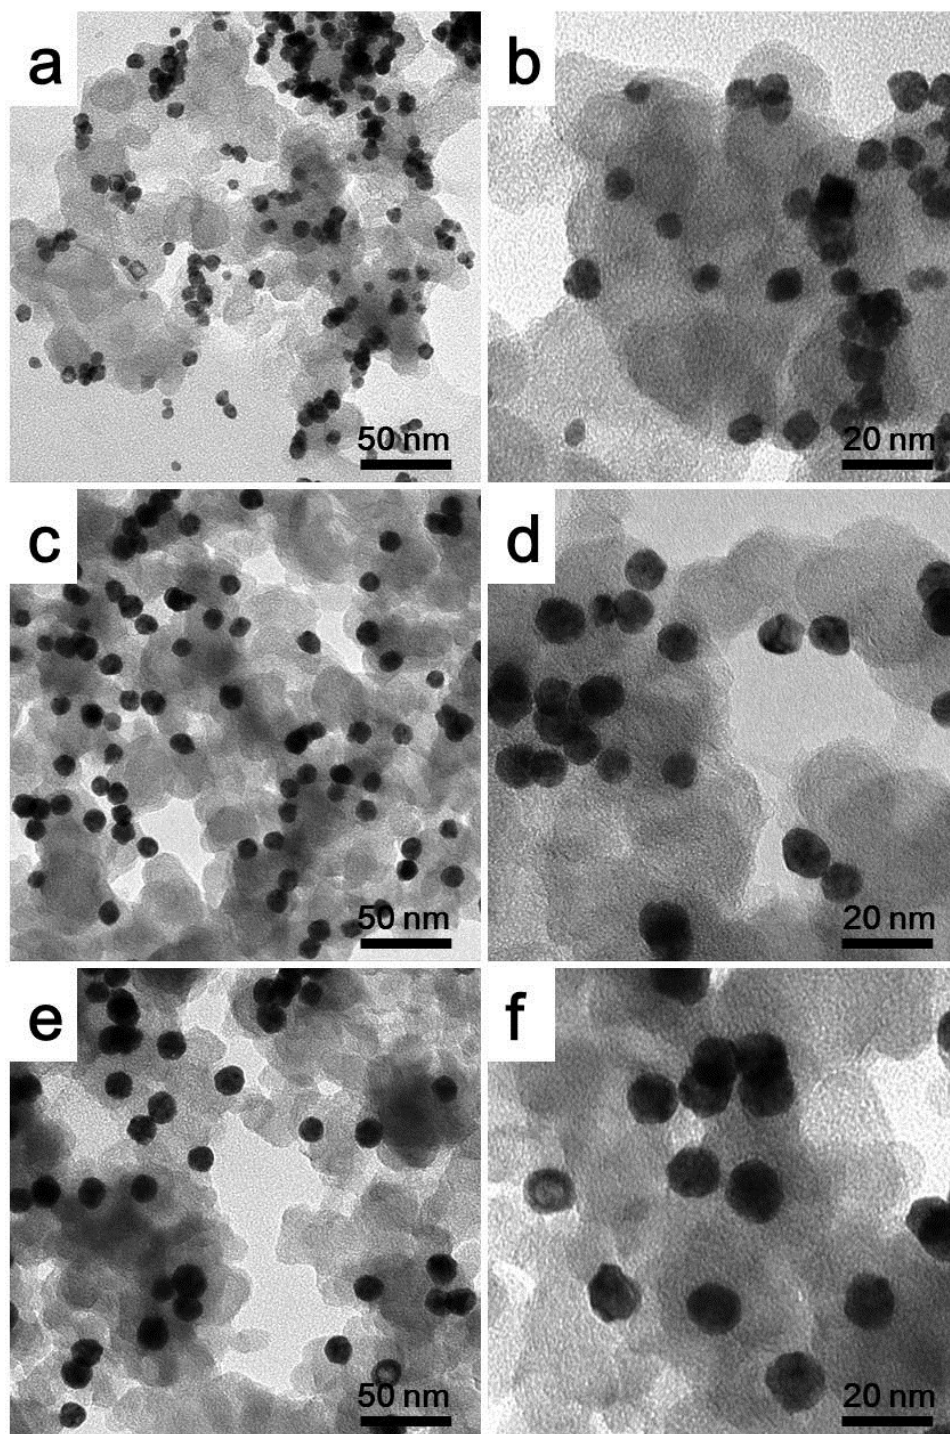

Figure S9 TEM images of (a, b) PtAg-S/C NPs, (c, d) PtAg-M/C NPs, and (e, f) and PtAg-L/C NPs after 250 cycles in 1 M KOH and 1M EG solution at  $50 \text{ mV s}^{-1}$ .

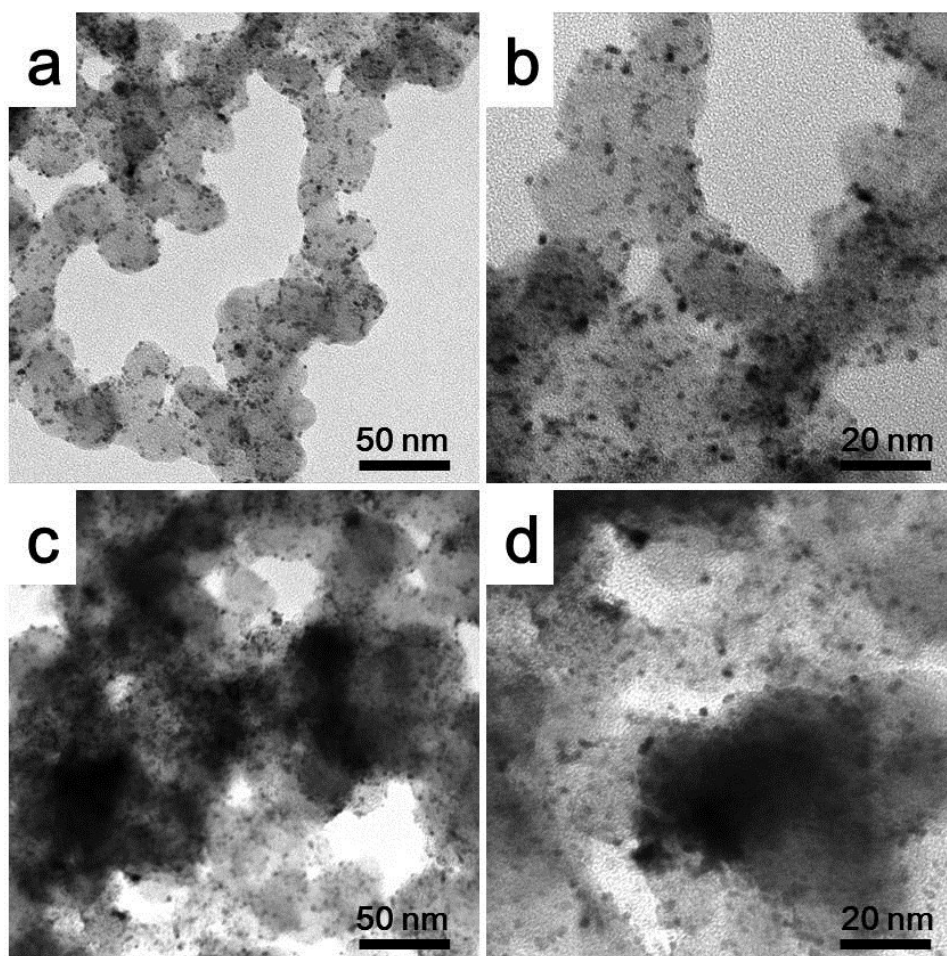

Figure S10. TEM images of Pt/C (a, b) before and (c, d) after 250 cycles in 1 M KOH containing 1M EG at  $50 \text{ mV s}^{-1}$ .

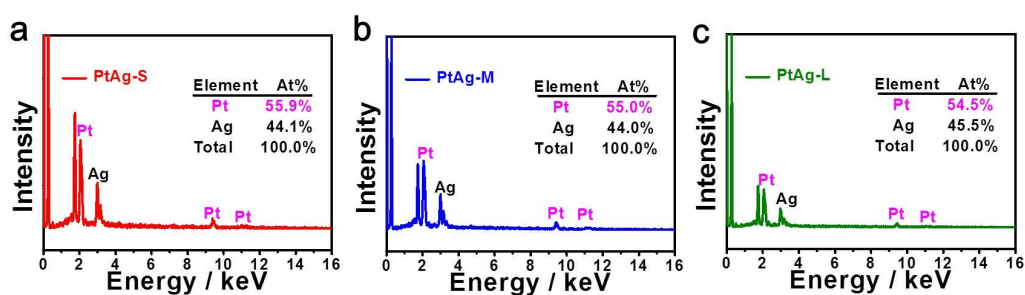

Figure S11 SEM-EDS of (a) PtAg-S/C NPs (b) PtAg-M/C NPs and (c) PtAg-L/C NPs after 250 cycles in 1 M KOH containing 1M EG at  $50 \text{ mV s}^{-1}$ .

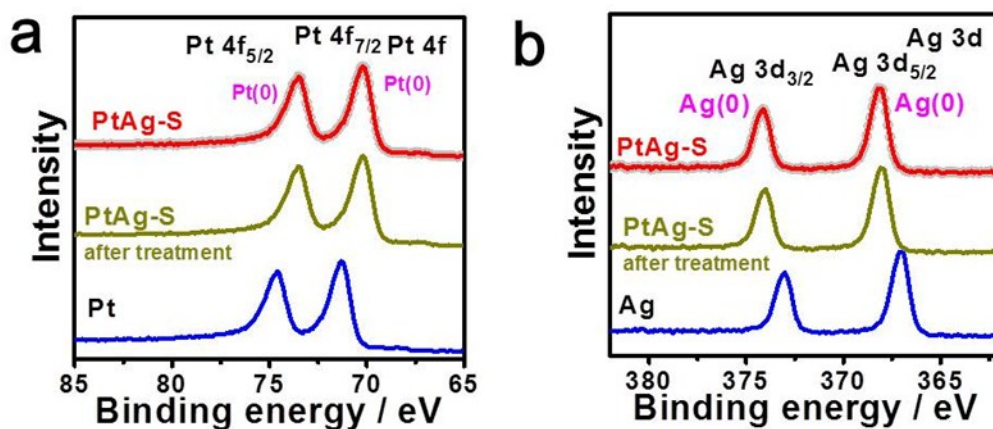

Figure S12 The typical XPS spectra of (a) Pt 4f and (b) Ag 3d in the PtAg-S NPs and PtAg-S NPs after treatment. the XPS spectra of pure Pt and pure Ag have also selected as references.

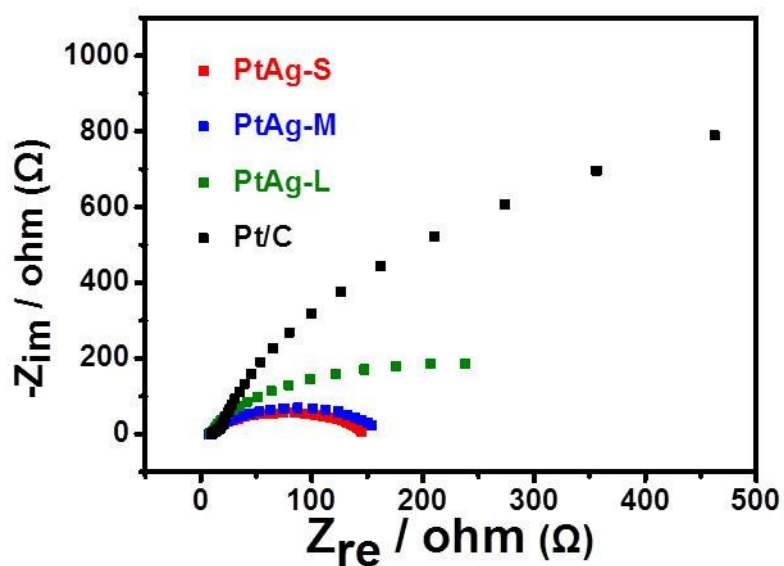

Figure S13 Nyquist plots of these four electrocatalysts operated in the solution of 1 M KOH + 1 M EG at the potential of -0.3 V after 250 cycles.

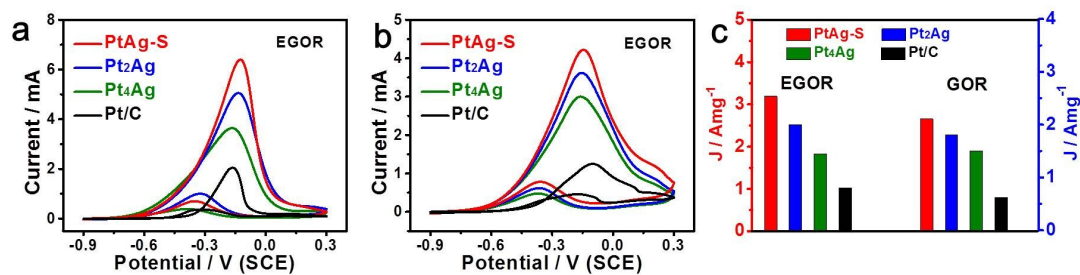

Figure S14 CVs of the PtAg-S NPs, Pt<sub>2</sub>Ag NPs, Pt<sub>4</sub>Ag NPs and commercial Pt/C for (a) EGOR and (b) GOR, respectively. (c) Mass activities for EGOR and GOR.

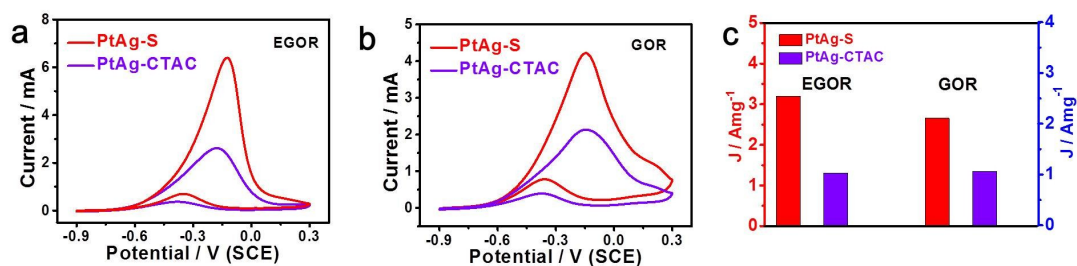

Figure S15 CVs of the PtAg-S NPs and PtAg-CTAC for (a) EGOR and (b) GOR, respectively. (c) Mass activities of PtAg-S NPs and PtAg-CTAC for EGOR and GOR.

Table S1 Comparison of PtAg-S NPs catalysts with other Pt-based electrocatalysts for the EGOR.

| Catalysts                                        | Peaks currents<br>from CV curves<br>$J_m$ (A/mg) | Electrolyte                                        | References                                             |
|--------------------------------------------------|--------------------------------------------------|----------------------------------------------------|--------------------------------------------------------|
| PtAg-s NPs                                       | 3.20                                             | 1.0 M KOH + 1.0 M EG                               | This work                                              |
| Pt <sub>4.5</sub> Pb NWs                         | 0.73                                             | 0.1M HClO <sub>4</sub> +<br>0.5 M EG               | Small <b>2016</b> , 12,<br>4464- 4470                  |
| Pt <sub>5.7</sub> Pb NWs                         | 0.63                                             |                                                    |                                                        |
| Pt-Sn<br>Nanocrystals/CNT                        | 0.22                                             | 0.5 M H <sub>2</sub> SO <sub>4</sub> + 1 M EG      | Int. J. Hydrogen Energy <b>2011</b> , 36, 5, 3313-3321 |
| Pt-Ru<br>Nanocrystals/CNT                        | 0.175                                            | 0.5 M H <sub>2</sub> SO <sub>4</sub> + 1 M EG      | Int. J. Hydrogen Energy <b>2012</b> , 37, 9941-9947.   |
| PtPd@Pt<br>Nanocrystals/rGO                      | 0.23                                             | 0.5 M H <sub>2</sub> SO <sub>4</sub> +<br>0.5 M EG | Electrochim. Acta <b>2016</b> , 18, 576-583.           |
| PtNi <sub>0.67</sub> Pb <sub>0.26</sub><br>NWs/C | 0.42                                             | 0.1 M HClO <sub>4</sub> +<br>0.2 M EG              | J. Mater. Chem. A <b>2017</b> , 5, 18977-18983         |
| PtRu alloy                                       | 3.052                                            | 1.0 M<br>KOH + 1.0 M EG                            | Int. J. Hydrogen Energy <b>2017</b> , 42, 20720-20728  |

Table S2 Comparison of PtAg-S NPs catalysts with other electrocatalysts for the GOR.

| Catalysts                                        | Peaks currents<br>from CV curves<br>Jm (A/mg) | Electrolyte                                 | References                                         |
|--------------------------------------------------|-----------------------------------------------|---------------------------------------------|----------------------------------------------------|
| PtAg-S                                           | 2.11                                          | 1.0 M KOH +<br>1.0 M Glycerol               | This work                                          |
| PtNi <sub>0.67</sub> Pb <sub>0.26</sub><br>NWs/C | 0.36                                          | 0.1 M HClO <sub>4</sub> +<br>0.2 M Glycerol | J. Mater. Chem. A<br>2017, 5, 18977-<br>18983      |
| PtNi/C                                           | 0.204                                         | 0.5 M KOH +<br>2.0 M Glycerol               | Appl. Catal. A<br>2012, 429-430, 39-<br>47         |
| Pd-CN <sub>x</sub> /G                            | 1.1                                           | 0.5 M KOH +<br>0.5 M Glycerol               | ACS Catal.<br>2015, 5, 3174-3180                   |
| Pd <sub>50</sub> Ni <sub>50</sub> /C             | 0.190                                         | 0.1 M KOH +<br>0.1 M Glycerol               | Electrocatal. 2013,<br>4, 167-178                  |
| Pd <sub>3</sub> Sn/phen-C                        | 0.175                                         | 0.1 M KOH +<br>0.5 M Glycerol               | Int. J. Hydrogen<br>Energy 2016, 41,<br>1272-14280 |
| Pd-NiO <sub>x</sub> -P/C                         | 0.364                                         | 0.1 M KOH +<br>0.5 M Glycerol               | Chem. Eng. J.<br>2017, 38, 419-427                 |
| PtAg nanotubes                                   | 0.208                                         | 0.5 M KOH +<br>0.5 M Glycerol               | Electrochem.<br>Commun.<br>2014,46,36-39           |
